# Supplementary material for: High Fat Diet-Induced Obesity Dysregulates Splenic B Cell Mitochondrial Activity
Source: MDPI journal article supplement (doi:10.3390/nu15224807), 2023-11-17
Supplement: s1 [file s1]

# High Fat Diet-Induced Obesity Dysregulates Splenic B Cell Mitochondrial Activity

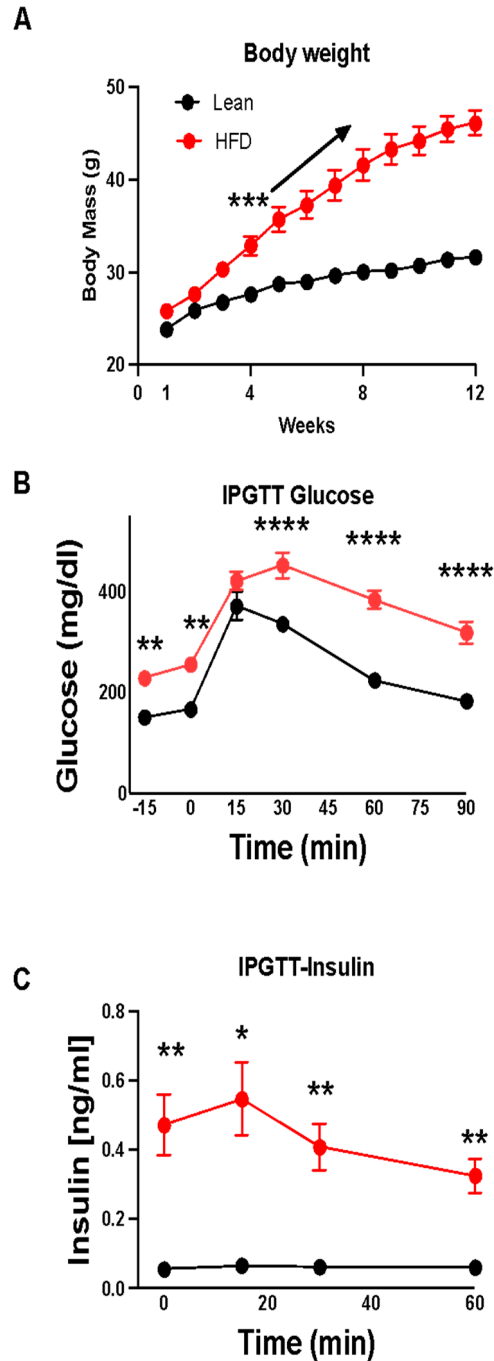

**Figure S1.** Metabolic profile of C57BL/6J mice fed a high fat diet. **(A)** Body weights in response to a control lean diet or high fat diet for C57BL/6J male mice. **(B)** Glucose and **(C)** insulin levels from an IPGTT conducted after a 5 h fast. In B, glucose levels were measured 15 min prior to administration of glucose at time 0. Data are average  $\pm$  SEM for  $n = 12$  mice per group for body weight and  $n = 4-6$  for IPGTT per group. \*  $p < 0.05$ .
